# Supplementary material
Source: PubMed Central journal article supplement (PMC4542271)

## SUPPLEMENTARY DATA

### Supplementary Appendix 1. Inclusion/exclusion criteria for participants without type 1 diabetes

- a. < 35 or > 60 yrs.
- b. Non-English speaking
- c. HTN history or taking medications for HTN.
- d. Regular night shift.
- e. Insulin dependent diabetic.
- f. Any cardiac disease, insulin dependent diabetes, seizure disorder, unconscious > 30 mins, amnesia > 24hrs, more than 2 episodes of MTBI, any physical or psychological problem you deal with on a daily basis for 3+ months, chronic liver or kidney disease, treatment for cancer in the past 12 months, serious neuropsychiatric conditions, stroke, multiple sclerosis, brain tumor.
- g. Metal in body, refused for an MRI or refused themselves – claustrophobia.
- h. Current pregnancy.
- i. >30% overweight by Metropolitan Life Insurance table standards
- j. Medications – see below.

Medications – any cardiac medication on a routine basis – exclude and for certain categories on a regular basis: anti-anxiety\*\*, narcotics\*, antihistamines\*, sleeping pills\*\*, inhaled medications for asthma, COPD (chronic bronchitis, emphysema) – exclude - \*/\*\* exceptions are made for those taking less than half of the time, but they must abstain for \*= 24hrs and \*\* = 72 hrs.

SUPPLEMENTARY DATA

**Supplementary Table 1.** Ordinal logistic regression models showing the effects of diabetes-specific factors on the odds of cognitive impairment, controlling for years of education. Measures taken at time of cognitive assessment (2010-2013) unless otherwise noted. Odds ratios here should be interpreted proportionately as: the odds of any cognitive impairment (1+ vs. 0 tests impaired at 1.5+ SD compared to published norms); also 2+ vs. 0-1 tests impaired.

| Model                                            | 1                                        | 2                                        | 3                                        | 4                                        | 5                                        |
|--------------------------------------------------|------------------------------------------|------------------------------------------|------------------------------------------|------------------------------------------|------------------------------------------|
|                                                  | Odds Ratio (95% Confidence Limits)       |                                          |                                          |                                          |                                          |
| Years of education                               | 0.79<br>(0.67, 0.93)<br><i>p</i> =0.004* | 0.78<br>(0.66, 0.92)<br><i>p</i> =0.004* | 0.78<br>(0.66, 0.92)<br><i>p</i> =0.003* | 0.78<br>(0.66, 0.92)<br><i>p</i> =0.003* | 0.78<br>(0.66, 0.93)<br><i>p</i> =0.006* |
| Average (1996-2013) HbA1c ≥ 7.5%                 | 3.03<br>(1.31, 6.99)<br><i>p</i> =0.01*  |                                          |                                          |                                          |                                          |
| Prevalent proliferative retinopathy †            |                                          | 2.79<br>(1.23, 6.33)<br><i>p</i> =0.01*  |                                          |                                          |                                          |
| Prevalent distal symmetric polyneuropathy †      |                                          |                                          | 2.55<br>(1.13, 5.75)<br><i>p</i> =0.03*  |                                          |                                          |
| BMI (kg/m <sup>2</sup> )                         |                                          |                                          |                                          | 1.10<br>(1.01, 1.20)<br><i>p</i> =0.03*  |                                          |
| Ankle-brachial index ≥ 1.3 or non-compressible † |                                          |                                          |                                          |                                          | 4.19<br>(1.38, 12.72)<br><i>p</i> =0.01* |

\* Statistically significant using Bonferroni corrected *p*<0.03

† assessed at EDC exam in years prior to cognitive testing; interval from 2004-2006 assessment to cognitive testing (2010-2013) added to model

Variables in Model:

Model 1: Years of education + 14-year average HbA1c ≥ 7.5%

Model 2: Years of education + prevalent proliferative retinopathy (assessed 2004-2006)

Model 3: Years of education + prevalent distal symmetric polyneuropathy (assessed 2004-2006)

Model 4: Years of education + BMI

Model 5: Years of education + ABI ≥ 1.3

SUPPLEMENTARY DATA

**Supplementary Table 2.** False discovery rate calculations (FDR=0.2) using the Benjamini-Hochberg correction method to determine statistical significance (“TRUE” vs “FALSE”) when comparing factors between participants with compare to participants without type 1 diabetes (main text, Table 1).

| <i>i</i> | <i>p</i> | <i>q*</i> | <i>p &lt; q*</i> | Factor                         |
|----------|----------|-----------|------------------|--------------------------------|
| 1        | 0.0000   | 0.0200    | TRUE             | Serum glucose                  |
| 2        | 0.0000   | 0.0400    | TRUE             | DBP                            |
| 3        | 0.0001   | 0.0600    | TRUE             | History of high blood pressure |
| 4        | 0.0030   | 0.0800    | TRUE             | Education                      |
| 5        | 0.0300   | 0.1000    | TRUE             | Physical activity              |
| 6        | 0.1100   | 0.1200    | TRUE             | BMI                            |
| 7        | 0.1200   | 0.1400    | FALSE            | Apo E4 (24, 34, 44)            |
| 8        | 0.5100   | 0.1600    | FALSE            | Female                         |
| 9        | 0.7200   | 0.1800    | FALSE            | Age                            |
| 10       | 0.9100   | 0.2000    | FALSE            | SBP                            |

SUPPLEMENTARY DATA

**Supplementary Table 3.** False discovery rate calculations (FDR=0.2) using the Benjamini-Hochberg correction method to determine statistical significance (“TRUE” vs “FALSE”) when comparing factors between participants with type 1 diabetes by cognitive impairment status (main text, Table 1).

| <i>i</i> | <i>p</i> | <i>q*</i> | <i>p &lt; q*</i> | Factor                                 |
|----------|----------|-----------|------------------|----------------------------------------|
| 1        | 0.0040   | 0.0095    | TRUE             | Education                              |
| 2        | 0.0100   | 0.0190    | TRUE             | 14-yr average A1c > 7.5%               |
| 3        | 0.0100   | 0.0286    | TRUE             | A1c > 7.5%                             |
| 4        | 0.0300   | 0.0381    | TRUE             | Distal symmetric polyneuropathy *      |
| 5        | 0.0300   | 0.0476    | TRUE             | Proliferative retinopathy *            |
| 6        | 0.0500   | 0.0571    | TRUE             | BMI                                    |
| 7        | 0.0500   | 0.0667    | TRUE             | Average ABI > 1.3 †                    |
| 8        | 0.0600   | 0.0762    | TRUE             | 24-year A1c months                     |
| 9        | 0.1500   | 0.0857    | FALSE            | Estimated glomerular filtration rate * |
| 10       | 0.1500   | 0.0952    | FALSE            | Coronary artery disease *              |
| 11       | 0.1800   | 0.1048    | FALSE            | Physical activity *                    |
| 12       | 0.2600   | 0.1143    | FALSE            | Age                                    |
| 13       | 0.2900   | 0.1238    | FALSE            | T1D duration                           |
| 14       | 0.3700   | 0.1333    | FALSE            | Cardiac autonomic neuropathy *         |
| 15       | 0.3800   | 0.1429    | FALSE            | History of high blood pressure         |
| 16       | 0.4700   | 0.1524    | FALSE            | SBP                                    |
| 17       | 0.5000   | 0.1619    | FALSE            | DBP                                    |
| 18       | 0.6100   | 0.1714    | FALSE            | Age at T1D diagnosis                   |
| 19       | 0.93     | 0.180952  | FALSE            | Serum glucose                          |
| 20       | 0.96     | 0.190476  | FALSE            | Female                                 |
| 21       | 0.97     | 0.2       | FALSE            | Apo E4 (24, 34, 44)                    |

All measures from time of cognitive testing unless otherwise specified

\* measured in 2004-2006

† measured in 1990-1992

SUPPLEMENTARY DATA

**Supplementary Table 4.** False discovery rate calculations (FDR=0.2) using the Benjamini-Hochberg correction method to determine statistical significance (“TRUE” vs “FALSE”) when comparing raw cognitive test scores between participants with and without type 1 diabetes (main text, Table 2).

| <i>i</i> | <i>p</i> | <i>q*</i> | <i>p &lt; q*</i> | Factor            |
|----------|----------|-----------|------------------|-------------------|
| 1        | 0.0000   | 0.0111    | TRUE             | DSST              |
| 2        | 0.0000   | 0.0222    | TRUE             | GP                |
| 3        | 0.0000   | 0.0333    | TRUE             | ROCF-copy         |
| 4        | 0.0005   | 0.0444    | TRUE             | NAART raw         |
| 5        | 0.0012   | 0.0556    | TRUE             | NAART scaled      |
| 6        | 0.0020   | 0.0667    | TRUE             | TMT Ratio B:A     |
| 7        | 0.0200   | 0.0778    | TRUE             | TMTB              |
| 8        | 0.0500   | 0.0889    | TRUE             | LN Sequence       |
| 9        | 0.0600   | 0.1000    | TRUE             | Stroop Color-Word |
| 10       | 0.0960   | 0.1111    | TRUE             | FAS               |
| 11       | 0.1040   | 0.1222    | TRUE             | 4WSTM, 5s list    |
| 12       | 0.1470   | 0.1333    | FALSE            | Animals           |
| 13       | 0.1700   | 0.1444    | FALSE            | 4WSTM, 15s list   |
| 14       | 0.3400   | 0.1556    | FALSE            | RVLT interference |
| 15       | 0.4100   | 0.1667    | FALSE            | ROCF-delay        |
| 16       | 0.4400   | 0.1778    | FALSE            | RVLT sum          |
| 17       | 0.6600   | 0.1889    | FALSE            | RVLT delay        |
| 18       | 0.7600   | 0.2000    | FALSE            | 4WSTM, 30s list   |

SUPPLEMENTARY DATA

**Supplementary Figure 1.** Flow chart showing recruitment of participants with type 1 diabetes from the parent Pittsburgh Epidemiology of Diabetes Complications (EDC) Study into the ancillary neurocognitive/neuroimaging (MRI) study.

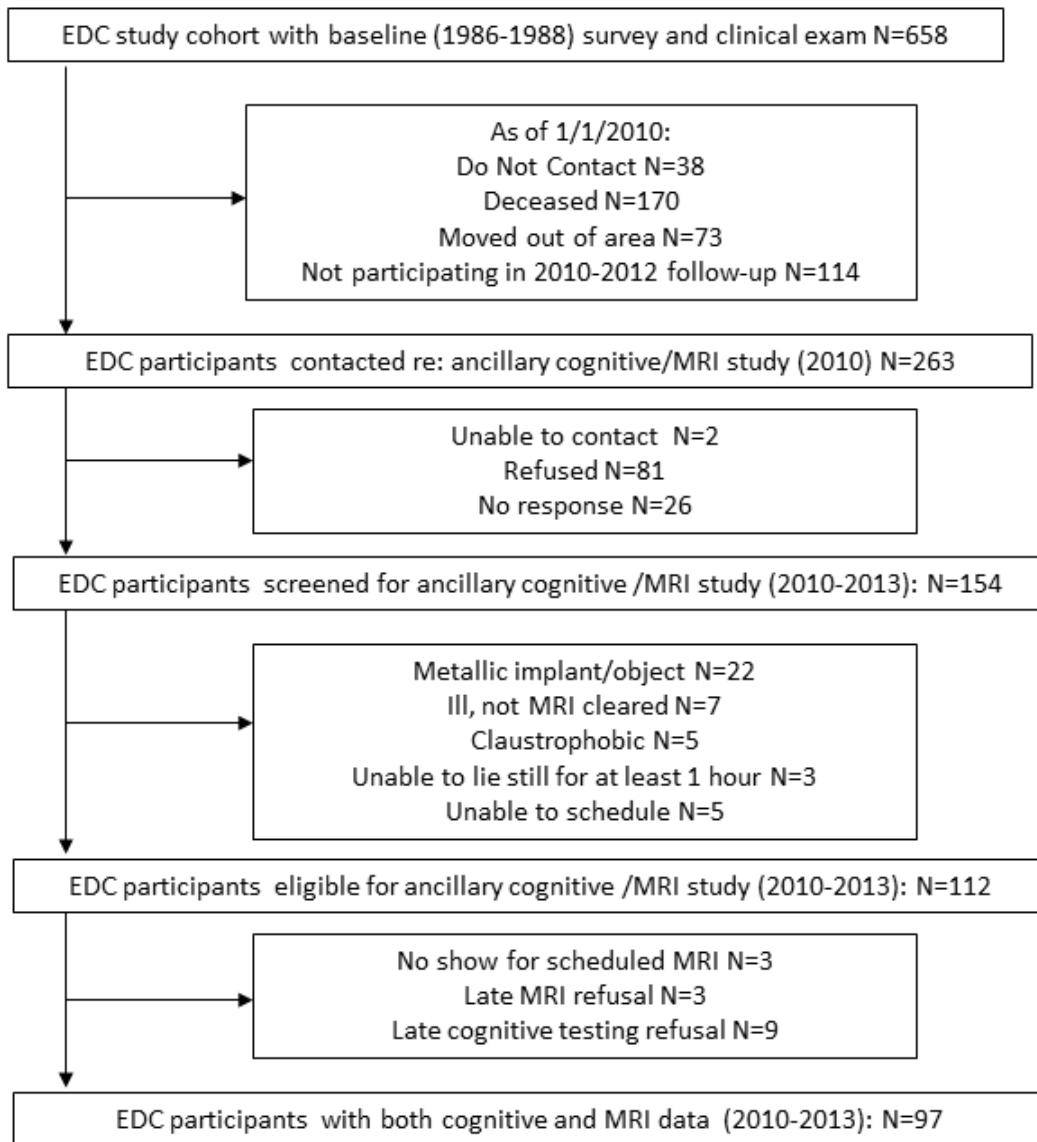

SUPPLEMENTARY DATA

**Supplementary Figure 2.** Standardized effect sizes of differences in raw cognitive test scores between participants with type 1 diabetes (Pittsburgh Epidemiology of Diabetes Complications Study) and without type 1 diabetes (Pittsburgh MR Hyper Study). Sample size for participants with type 1 diabetes provided above, numbers shown in parentheses (e.g., N=95). For participants without type 1 diabetes, N=138 for all tasks except NAART (NAART N=137).

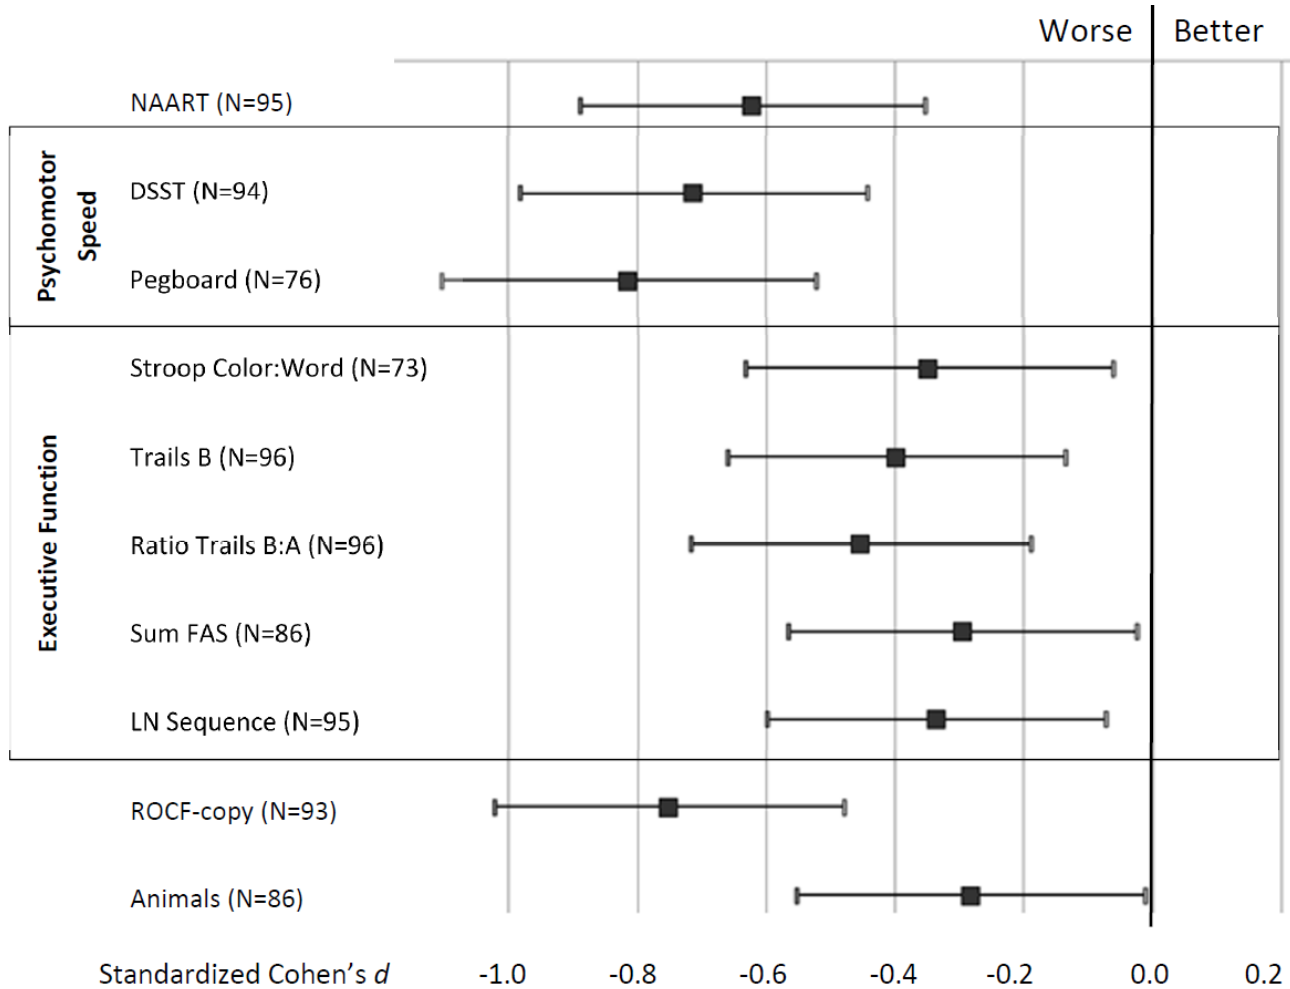

Supplement: supp_dc15-0041v150041_DC150041SupplementaryData.pdf [file supp_dc15-0041v150041_DC150041SupplementaryData.pdf]
